# Supplementary material
Source: MDPI journal article supplement (https://www.mdpi.com/2073-4441/14/17/2659)
Supplement: s1 [file s1]

## Supplementary Materials (S)

**Table S1.** Mean abundance  $\pm$  standard error (individuals/1000 mL) of caprellids species collected in the local basibionts and the collectors for the two study periods (one month and three months respectively from the deployment of collectors) at each marina surveyed (Sancti Petri marina (L1), Rota marina (L2) and Puerto América marina (L3)). N: native species for the study area. I: introduced species in the study area. C: cryptogenic species.

| SPECIES                     | Status | 1 Month            |                   |                   |                   |               |                   | 3 Months           |    |                   |                   |               |                 |
|-----------------------------|--------|--------------------|-------------------|-------------------|-------------------|---------------|-------------------|--------------------|----|-------------------|-------------------|---------------|-----------------|
|                             |        | Collectors         |                   |                   | Local basibionts  |               |                   | Collectors         |    |                   | Local basibionts  |               |                 |
|                             |        | L1                 | L2                | L3                | L1                | L2            | L3                | L1                 | L2 | L3                | L1                | L2            | L3              |
| <i>Caprella acanthifera</i> | N      | 8.9 $\pm$ 4.8      | -                 | 2.2 $\pm$ 2.2     | -                 | -             | -                 | 142.2 $\pm$ 82.0   | -  | -                 | -                 | -             | -               |
| <i>Caprella dilatata</i>    | C      | -                  | -                 | -                 | 88.9 $\pm$ 52.7   | -             | -                 | 248.9 $\pm$ 166.8  | -  | -                 | 213.0 $\pm$ 150.3 | -             | -               |
| <i>Caprella equilibra</i>   | C      | 48.9 $\pm$ 19.2    | 88.9 $\pm$ 60.1   | 75.6 $\pm$ 43.3   | 174.9 $\pm$ 105.5 | 9.3 $\pm$ 9.3 | 936.2 $\pm$ 919.5 | 693.3 $\pm$ 404.4  | -  | -                 | 12.3 $\pm$ 12.3   | -             | -               |
| <i>Caprella scaura</i>      | I      | -                  | -                 | 928.9 $\pm$ 796.0 | -                 | 4.6 $\pm$ 4.6 | 385.5 $\pm$ 309.9 | -                  | -  | 533.3 $\pm$ 324.4 | -                 | 9.8 $\pm$ 6.6 | 63.6 $\pm$ 34.9 |
| <i>Paracaprella pusilla</i> | I      | 46.7 $\pm$ 46.7    | -                 | -                 | 24.2 $\pm$ 12.5   | -             | -                 | 1244.4 $\pm$ 244.1 | -  | 35.6 $\pm$ 35.6   | 219.2 $\pm$ 114.9 | -             | 34.6 $\pm$ 24.0 |
| <i>Phtisica marina</i>      | C      | 1133.3 $\pm$ 284.1 | 186.7 $\pm$ 151.3 | 4.4 $\pm$ 2.9     | 12.2 $\pm$ 8.2    | -             | -                 | 160.0 $\pm$ 80.0   | -  | -                 | 25.0 $\pm$ 16.7   | -             | -               |

**Table S2.** Results of three-way analysis of variance (ANOVA) for the effects of substrate type (SU, CO = collectors and LB = local basibionts), time (TI, T1 = one month and T3 = three months) and locality (LO, L1= Sancti Petri, L2 = Rota and L3 = Puerto América) of deployment on the abundance of caprellid species collected. MS = mean square; *F* = Fisher's statistic; *P* = level of significance; df = degrees of freedom

| Source of variation                      | df  | MS                   | F    | P      | Source of variation                      | df  | MS                                                                                 | F     | P         |
|------------------------------------------|-----|----------------------|------|--------|------------------------------------------|-----|------------------------------------------------------------------------------------|-------|-----------|
| Abundance of <i>Caprella scaura</i>      |     |                      |      |        | Abundance of <i>Paracaprella pusilla</i> |     |                                                                                    |       |           |
| Substrate (SU)                           | 1   | 747899.2161          | 0.96 | 0.4309 | Substrate (SU)                           | 1   | 824788.8353                                                                        | 1.00  | 0.4221    |
| Time (TI)                                | 1   | 380473.3755          | 0.98 | 0.4268 | Time (TI)                                | 1   | 1605203.3525                                                                       | 1.16  | 0.3943    |
| Locality (LO)                            | 2   | 2719480.6165         | 4.34 | 0.0157 | Locality (LO)                            | 2   | 1689081.6393                                                                       | 29.27 | 0.0000*** |
| SU x TI                                  | 1   | 4664.4912            | 1.23 | 0.3834 | SU x TI                                  | 1   | 755560.4379                                                                        | 1.00  | 0.4221    |
| SU x LO                                  | 2   | 780856.0444          | 1.25 | 0.2925 | SU x LO                                  | 2   | 822460.6421                                                                        | 14.25 | 0.0000*** |
| TI x LO                                  | 2   | 388866.5957          | 0.62 | 0.5400 | TI x LO                                  | 2   | 1385443.6639                                                                       | 24.01 | 0.0000*** |
| SU x TI x LO                             | 2   | 3802.7257            | 0.01 | 0.9940 | SU x TI x LO                             | 2   | 753332.1880                                                                        | 13.05 | 0.0000*** |
| Residual                                 | 96  | 627127.0341          |      |        | Residual                                 | 96  | 57709.8863                                                                         |       |           |
| Total                                    | 107 |                      |      |        | Total                                    | 107 |                                                                                    |       |           |
| Cochran's C-test                         |     | C = 0.7577; P < 0.01 |      |        | Cochran's C-test                         |     | C = 0.7742; P < 0.01                                                               |       |           |
| Transformation                           |     | None                 |      |        | Transformation                           |     | None                                                                               |       |           |
|                                          |     |                      |      |        |                                          |     | SU x TI x LO:                                                                      |       |           |
| SNK                                      |     |                      |      |        | SNK                                      |     | T1 x L1: CO > LB; T1 x L2, L3: CO = LB.<br>T3 x L1, L3: CO > LB; T3 x L2: CO = LB. |       |           |
| Abundance of <i>Caprella acanthifera</i> |     |                      |      |        | Abundance of <i>Caprella dilatata</i>    |     |                                                                                    |       |           |
| Substrate (SU)                           | 1   | 9444.4702            | 0.09 | 0.7957 | Substrate (SU)                           | 1   | 2101.2263                                                                          | 1.00  | 0.4226    |
| Time (TI)                                | 1   | 186789.9546          | 0.14 | 0.7469 | Time (TI)                                | 1   | 104344.2052                                                                        | 1.00  | 0.4226    |
| Locality (LO)                            | 2   | 672969.6941          | 0.88 | 0.4190 | Locality (LO)                            | 2   | 227459.6842                                                                        | 5.70  | 0.0046**  |
| SU x TI                                  | 1   | 2210629.3298         | 4.13 | 0.1791 | SU x TI                                  | 1   | 11677.9717                                                                         | 1.00  | 0.4226    |
| SU x LO                                  | 2   | 1084502.9731         | 1.41 | 0.2481 | SU x LO                                  | 2   | 2101.2263                                                                          | 0.05  | 0.9487    |
| TI x LO                                  | 2   | 1364690.3181         | 1.78 | 0.1742 | TI x LO                                  | 2   | 104344.2052                                                                        | 2.62  | 0.0783    |
| SU x TI x LO                             | 2   | 535023.1701          | 0.70 | 0.5002 | SU x TI x LO                             | 2   | 11677.9717                                                                         | 0.29  | 0.7468    |
| Residual                                 | 96  | 766692.7380          |      |        | Residual                                 | 96  | 39886.2933                                                                         |       |           |
| Total                                    | 107 |                      |      |        | Total                                    | 107 |                                                                                    |       |           |
| Cochran's C-test                         |     | C = 0.8270; P < 0.01 |      |        | Cochran's C-test                         |     | C = 0.5230; P < 0.01                                                               |       |           |
| Transformation                           |     | None                 |      |        | Transformation                           |     | None                                                                               |       |           |
| SNK                                      |     |                      |      |        | SNK                                      |     | LO: L1 > L2 = L3.                                                                  |       |           |
| Abundance of <i>Caprella equilibra</i>   |     |                      |      |        | Abundance of <i>Phtisica marina</i>      |     |                                                                                    |       |           |
| SU                                       | 1   | 59737.0370           | 2.97 | 0.2270 | Substrate (SU)                           | 1   | 1570810.4058                                                                       | 1.53  | 0.3420    |
| TI                                       | 1   | 3.7037               | 0.00 | 0.9900 | Time (TI)                                | 1   | 994774.9340                                                                        | 1.72  | 0.3205    |
| LO                                       | 2   | 20114.8148           | 2.51 | 0.0869 | Locality (LO)                            | 2   | 1162621.0319                                                                       | 13.73 | 0.0000*** |
| SU x TI                                  | 1   | 3.7037               | 0.00 | 0.9900 | SU x TI                                  | 1   | 1039365.7629                                                                       | 1.69  | 0.3228    |
| SU x LO                                  | 2   | 20114.8148           | 2.51 | 0.0869 | SU x LO                                  | 2   | 1028821.6492                                                                       | 12.15 | 0.0000*** |
| TI x LO                                  | 2   | 18692.5926           | 2.33 | 0.1029 | TI x LO                                  | 2   | 579863.6906                                                                        | 6.85  | 0.0017**  |
| SU x TI x LO                             | 2   | 18692.5926           | 2.33 | 0.1029 | SU x TI x LO                             | 2   | 613477.0063                                                                        | 7.25  | 0.0012**  |
| Residual                                 | 96  | 8025.9259            |      |        | Residual                                 | 96  | 84665.0905                                                                         |       |           |
| Total                                    | 107 |                      |      |        | Total                                    | 107 |                                                                                    |       |           |
| Cochran's C-test                         |     | C = 0.6276; P < 0.01 |      |        | Cochran's C-test                         |     | C = 0.7149; P < 0.01                                                               |       |           |
| Transformation                           |     | None                 |      |        | Transformation                           |     | None                                                                               |       |           |
|                                          |     |                      |      |        |                                          |     | SU x TI x LO:                                                                      |       |           |
| SNK                                      |     |                      |      |        | SNK                                      |     | T1 x L1, L2, L3: CO > LB.<br>T3 x L1: CO > LB; T3 x L2, L3: CO = LB.               |       |           |

\*\* *P* < 0.01; \*\*\* *P* < 0.001
